# Supplementary material for: The impact of mindfulness‐based interventions on doctors’ well‐being and performance: A systematic review
Source: PubMed Central journal article supplement — Med Educ. 2019 Dec 22;54(2):138–49. doi: 10.1111/medu.14020 (PMC7003865; doi:10.1111/medu.14020), 2019-12-22
Supplement: MEDU-54-138-s001.pdf [file MEDU-54-138-s001.pdf]

## **APPENDIX**

### **Search strings**

#### **PUBMED**

(mindfulness [tiab] OR "Mindfulness" [Mesh] OR "Acceptance and Commitment Therapy"[Mesh] OR "Mind-Body Therapies"[Mesh:NoExp] OR "Meditation"[Mesh] OR meditation [tiab] OR mindfulness-based [tiab] OR mindful awareness [tiab] OR mind fitness training [tiab] OR MFT [tiab] OR mindful practice [tiab] OR mindfulness-based stress reduction [tiab] OR MBSR [tiab] OR cognitive behavioural stress reduction [tiab])

**AND** ("physicians"[Mesh] OR physicians [tiab] OR physician [tiab] OR doctors [tiab] OR doctor [tiab] OR clinician\* [tiab] OR GP [tiab] OR general practitioner [tiab] OR general practitioners [tiab] OR hospitalist\*[tiab] OR anesthesiologist\*[tiab] OR anaesthesiologist\*[tiab] OR gynecologist\*[tiab] OR gynaecologist\*[tiab] OR surgeon\*[tiab] OR pediatrician\*[tiab] OR radiologist\*[tiab] OR neurologist\*[tiab] OR psychiatrist[tiab] OR resident [tiab] OR residents [tiab] OR trainee\* [tiab] OR fellow [tiab])

**NOT** ("Letter"[Publication Type] OR "Comment"[Publication Type] OR "Editorial"[Publication Type] OR "Guideline"[Publication Type] OR "Case Reports"[Publication Type])

#### **PsycINFO**

\*mindfulness/ or \*"acceptance and commitment therapy"/ or \*meditation/ or \*body awareness/ or \*Mind Body Therapy/ or (mindfulness OR acceptance and commitment therapy OR mind body skills OR meditation OR mindfulness-based OR mindful awareness OR mind fitness training OR MFT OR mindful practice OR mindfulness-based stress reduction OR MBSR OR cognitive behavioural stress reduction).id or (mindfulness OR acceptance and commitment therapy OR mind body skills OR meditation OR mindfulness-based OR mindful awareness OR

mind fitness training OR MFT OR mindful practice OR mindfulness-based stress reduction OR MBSR OR cognitive behavioural stress reduction).ti,ab

**AND** (exp physicians/) or (physician or physicians OR doctor or doctors OR GP OR general practitioner OR general practitioners OR hospitalist\* OR anesthesiologist\* OR anaesthesiologist\* OR gynecologist\* OR gynaecologist\* OR surgeon\* OR pediatrician\* OR radiologist\* OR neurologist\* OR psychiatrist OR resident or residents or residency OR trainee\*OR fellow).id. or (physician OR physicians OR doctor OR doctors OR GP OR general practitioner OR general practitioners OR hospitalist\* OR anesthesiologist\* OR anaesthesiologist\* OR gynecologist\* OR gynaecologist\* OR surgeon\* OR pediatrician\* OR radiologist\* OR neurologist\* OR psychiatrist OR resident OR residents OR trainee\*OR fellow).ti,ab.

limit 3 to (("0100 journal" or "0110 peer-reviewed journal" or "0120 non-peer-reviewed journal" or "0130 peer-reviewed status unknown") and (journal article or review-book or review-media or review-software & other or reviews))

**Table 2.** Number of studies on MERSQI criteria

| <b>MERSQI criteria</b>                                                                           | <b>Number of studies</b> |
|--------------------------------------------------------------------------------------------------|--------------------------|
| Total of included studies                                                                        | 24                       |
| <b><i>Study design</i></b>                                                                       |                          |
| Single group cross-sectional                                                                     | 2                        |
| Single group pretest and posttest                                                                | 12                       |
| Non-randomized, two groups                                                                       | 3                        |
| Randomized controlled experiment                                                                 | 7                        |
| <b><i>Institutions</i></b>                                                                       |                          |
| Single institution                                                                               | 17                       |
| Two institutions                                                                                 | -                        |
| More than two institutions                                                                       | 7                        |
| <b><i>Response rate</i></b>                                                                      |                          |
| <50% OR not reported                                                                             | 14                       |
| 50-74%                                                                                           | 2                        |
| 75-100%                                                                                          | 8                        |
| <b><i>Type of data</i></b>                                                                       |                          |
| Assessment by study object                                                                       | 23                       |
| Objective measurement                                                                            | 1                        |
| <b><i>Internal structure (internal consistency, interrater reliability, factor analysis)</i></b> |                          |
| Not applicable                                                                                   | 3                        |
| Not reported                                                                                     | 14                       |
| Reported                                                                                         | 7                        |
| <b><i>Content validity</i></b>                                                                   |                          |
| Not applicable                                                                                   | 3                        |
| Not reported                                                                                     | -                        |
| Reported                                                                                         | 21                       |
| <b><i>Relations to other variables (criterion, concurrent, and predictive validity)</i></b>      |                          |
| Not applicable                                                                                   | 3                        |
| Not reported                                                                                     | 21                       |
| Reported                                                                                         | -                        |
| <b><i>Appropriateness of data analysis</i></b>                                                   |                          |
| Data analysis inappropriate for study design or type of data                                     | -                        |
| Data analysis appropriate for study design or type of data                                       | 24                       |
| <b><i>Sophistication of data analysis</i></b>                                                    |                          |
| Descriptive statistics only (frequencies, measures of central tendency)                          | 1                        |
| Beyond descriptive analysis (comparisons, correlations, relationships between variables)         | 23                       |
| <b><i>Highest outcome level</i></b>                                                              |                          |
| Satisfaction, attitudes, perceptions                                                             | 23                       |
| Knowledge, skills                                                                                | -                        |
| Behaviours                                                                                       | -                        |
| Patient/health care outcomes                                                                     | 1                        |

**Table 3.** Reported elements within training content of included MBI

| Article             | Mindfulness-based elements |                             |                       |                        |                            |
|---------------------|----------------------------|-----------------------------|-----------------------|------------------------|----------------------------|
|                     | <i>Mindfulness theory</i>  | <i>Didactic information</i> | <i>Self-awareness</i> | <i>Self-regulation</i> | <i>Meditation practice</i> |
| Amutio, 2015        | •                          | •                           | •                     | •                      | •                          |
| Beckman, 2012       | -                          | •                           | •                     | •                      | •                          |
| Bentley, 2018       | •                          | •                           | •                     | •                      | •                          |
| Gilmartin, 2018     | -                          | •                           | -                     | -                      | -                          |
| Goldhagen, 2015     | -                          | -                           | •                     | -                      | •                          |
| Goodman, 2012       | •                          | •                           | •                     | •                      | •                          |
| Hamilton-West, 2018 | •                          | •                           | •                     | •                      | •                          |
| Hoenders, 2016      | •                          | •                           | •                     | •                      | •                          |
| Ireland, 2018       | •                          | •                           | •                     | •                      | •                          |
| Krasner, 2009       | -                          | •                           | •                     | •                      | •                          |
| Lases, 2016         | •                          | •                           | •                     | -                      | •                          |
| Manoch, 2009        | -                          | •                           | -                     | -                      | •                          |
| Montero-Marin, 2017 | •                          | •                           | -                     | •                      | •                          |
| Pflugeisen, 2016    | -                          | -                           | -                     | -                      | •                          |
| Razzaque, 2016      | -                          | •                           | •                     | •                      | •                          |
| Sood, 2014          | •                          | •                           | •                     | •                      | -                          |
| Sood, 2011          | •                          | •                           | •                     | •                      | -                          |
| Taylor, 2016        | •                          | •                           | -                     | -                      | •                          |
| Thimmapuram, 2016   | -                          | -                           | -                     | -                      | •                          |
| Verweij, 2016       | •                          | •                           | •                     | •                      | •                          |
| Verweij, 2017       | •                          | •                           | •                     | •                      | •                          |
| Verweij, 2018       | •                          | •                           | •                     | •                      | •                          |
| West, 2014          | •                          | -                           | -                     | •                      | -                          |
| Wen, 2017           | -                          | -                           | -                     | -                      | •                          |

• Element was reported by the respective study

- Element was not reported by the respective study
